# Supplementary material
Source: MDPI journal article supplement (https://www.mdpi.com/2673-4141/4/1/11)
Supplement: s1 [file s1 › hydrogen-2195295-supplementary.pdf]

# Highly Effective Pt-Co/ZSM-5 Catalysts with Low Pt Loading for Preferential CO Oxidation in H<sub>2</sub>-Rich Mixture

Marina Shilina <sup>1,\*</sup>, Irina Krotova <sup>1</sup>, Sergey Nikolaev <sup>1</sup>, Sergey Gurevich <sup>2</sup>, Denis Yavsin <sup>2</sup>, Olga Udalova <sup>3</sup> and Tatiana Rostovshchikova <sup>1</sup>

<sup>1</sup> Department of Chemistry, Lomonosov Moscow State University, 119991 Moscow, Russia

<sup>2</sup> Ioffe Physico-Technical Institute, RAS, 194021 St. Petersburg, Russia

<sup>3</sup> Semenov Federal Research Center for Chemical Physics, RAS, 119991 Moscow, Russia

\* Correspondence: mish@kinet.chem.msu.ru

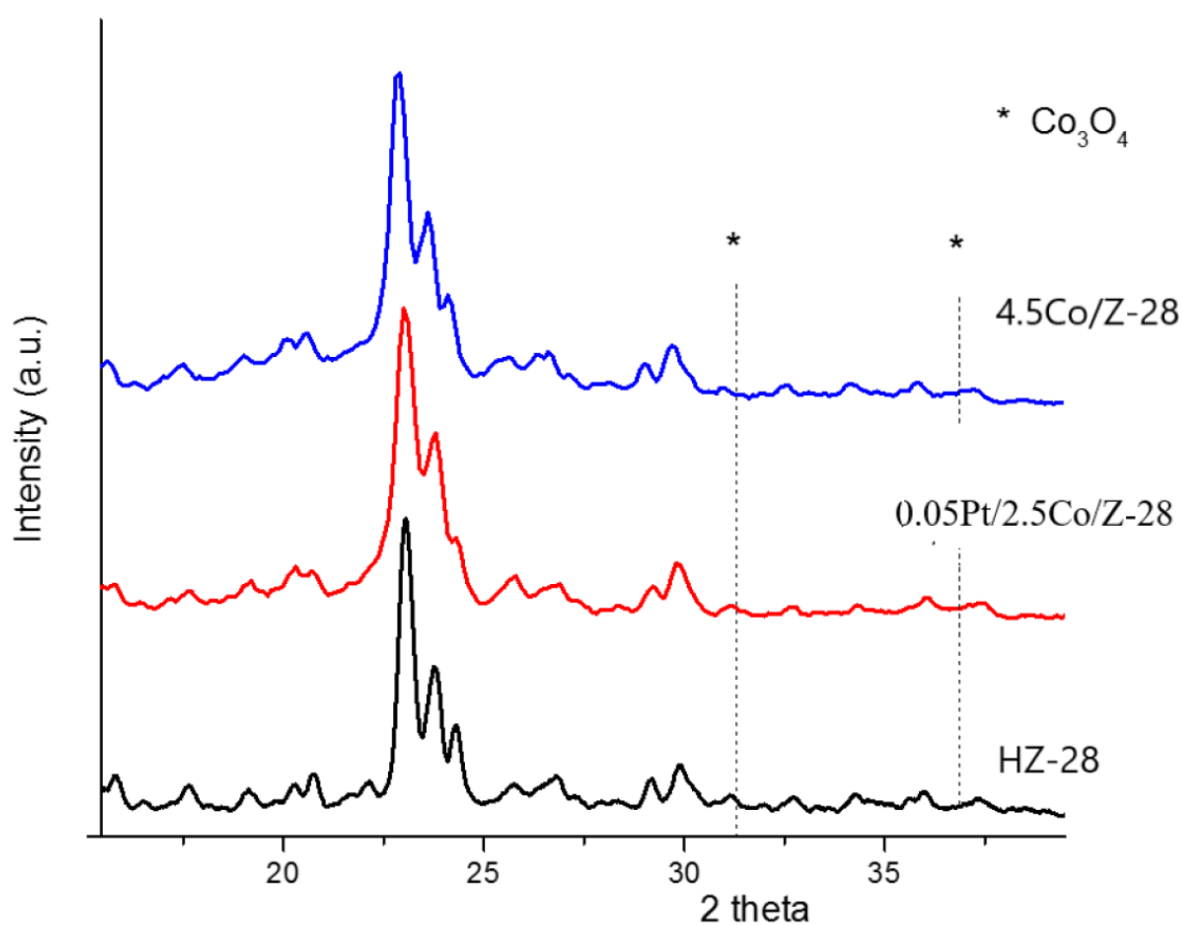

**Figure S1.** XRD patterns of the parent HZSM-5 and 0.05Pt/2.5Co/Z-28 and 4.5Co/Z-28 catalysts. The asterisks indicate the possible appearance of Co<sub>3</sub>O<sub>4</sub> signals (JPCDS: 76-1802).

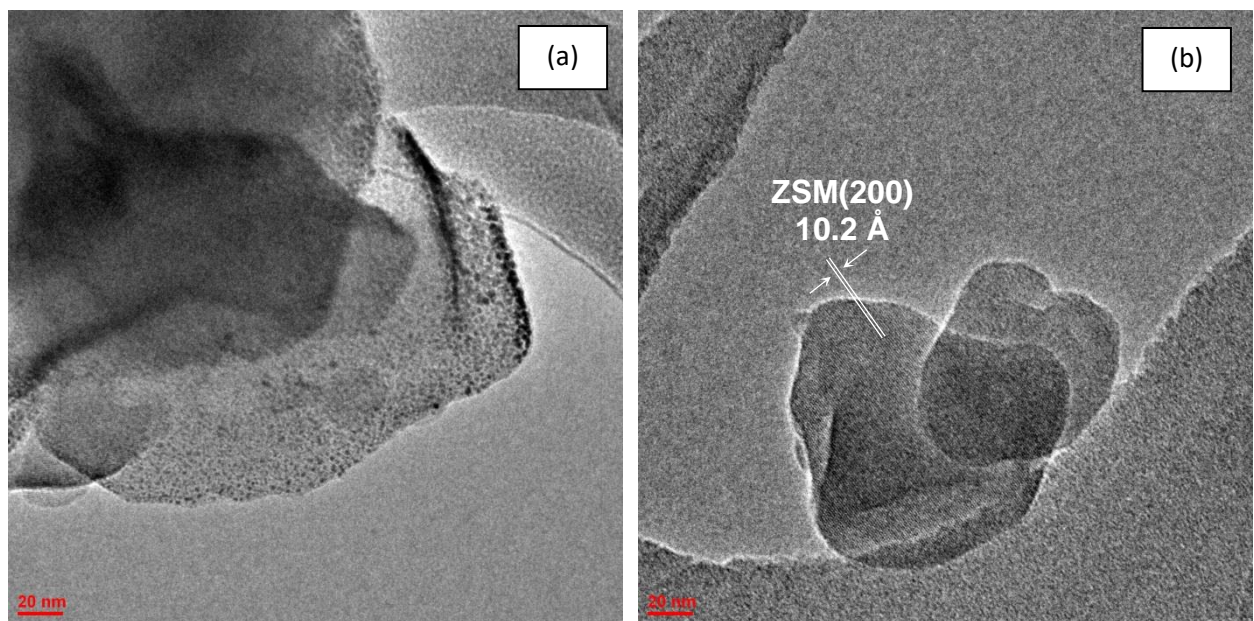

Figure S2. TEM images of (a) 0.01Pt and (b) Z-15.

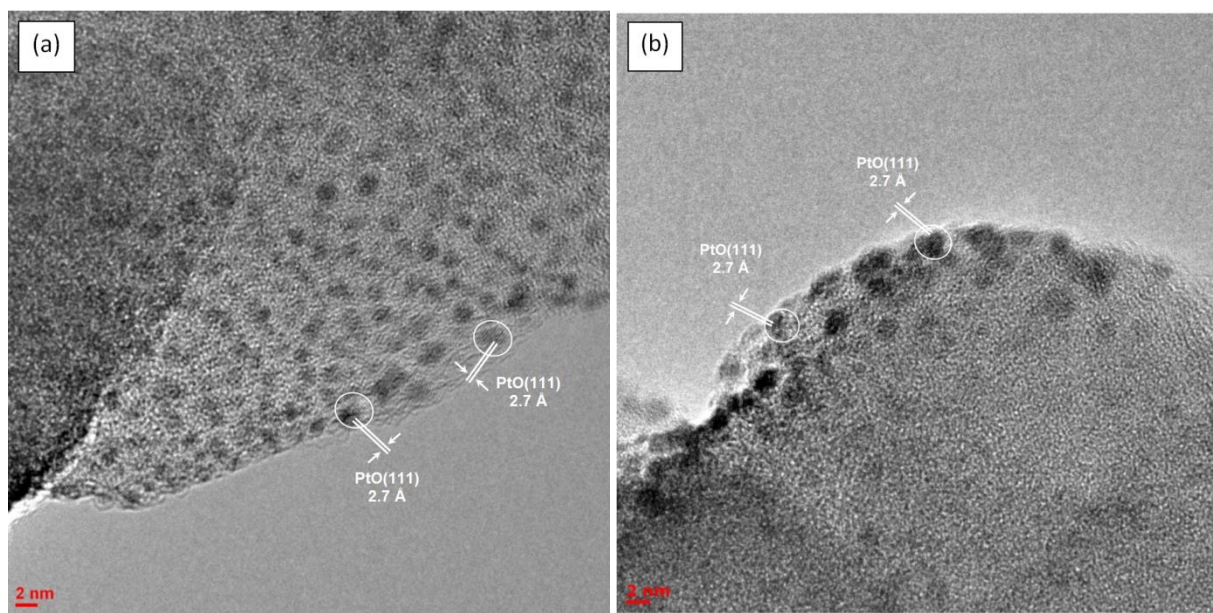

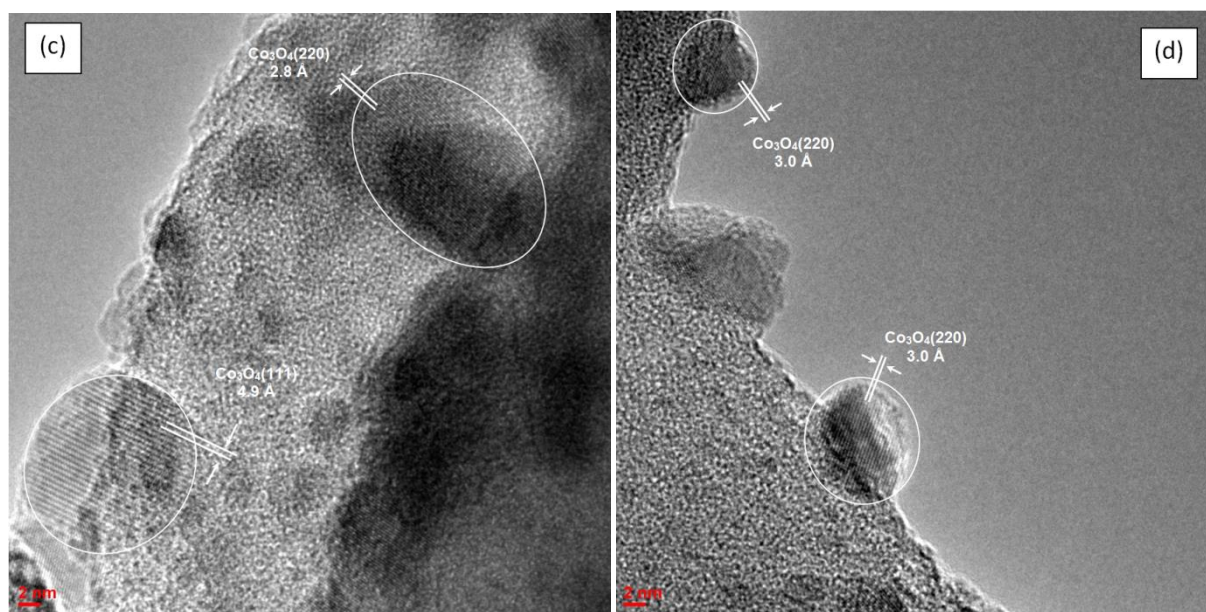

**Figure S3.** TEM images of (a) 0.05Pt (b) Z-28 and images of (c) 4.5Co (d) Z-28.

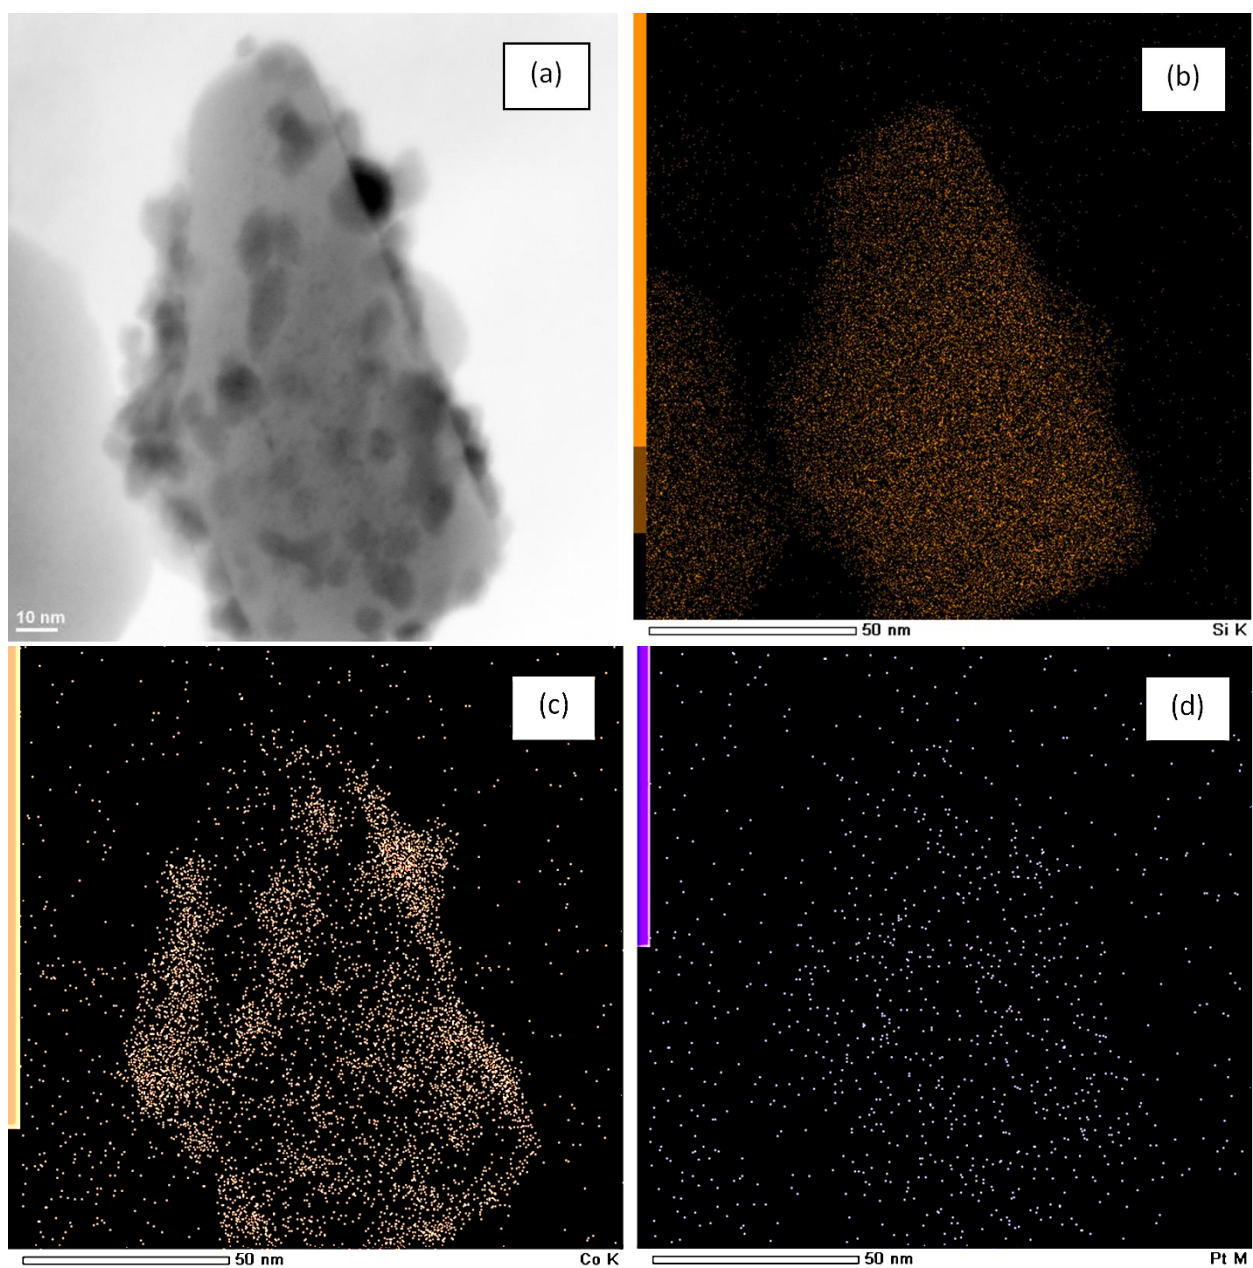

**Figure S4.** (a) TEM image and EDX element distribution maps of (b) Si, (c) Co and (d) Pt of 0.01Pt/4.5Co/Z-15.

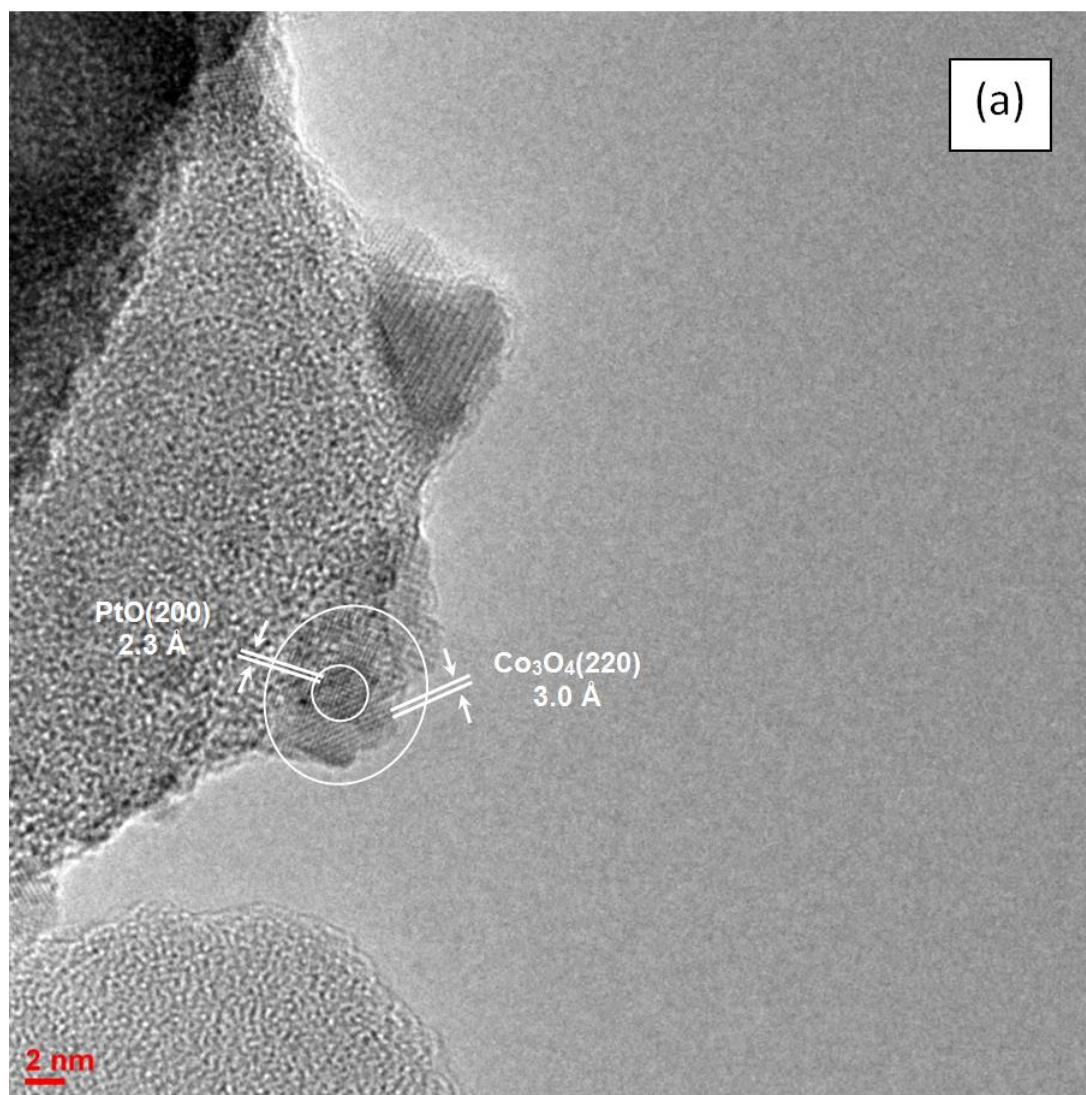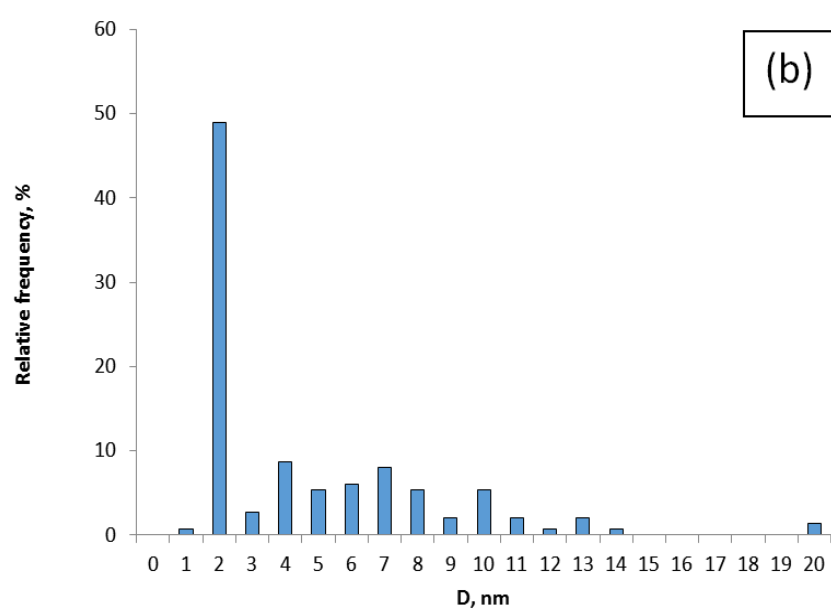

Figure S5. (a) TEM image and (b) particle size distribution of 0.01Pt/4.5Co/Z-15.

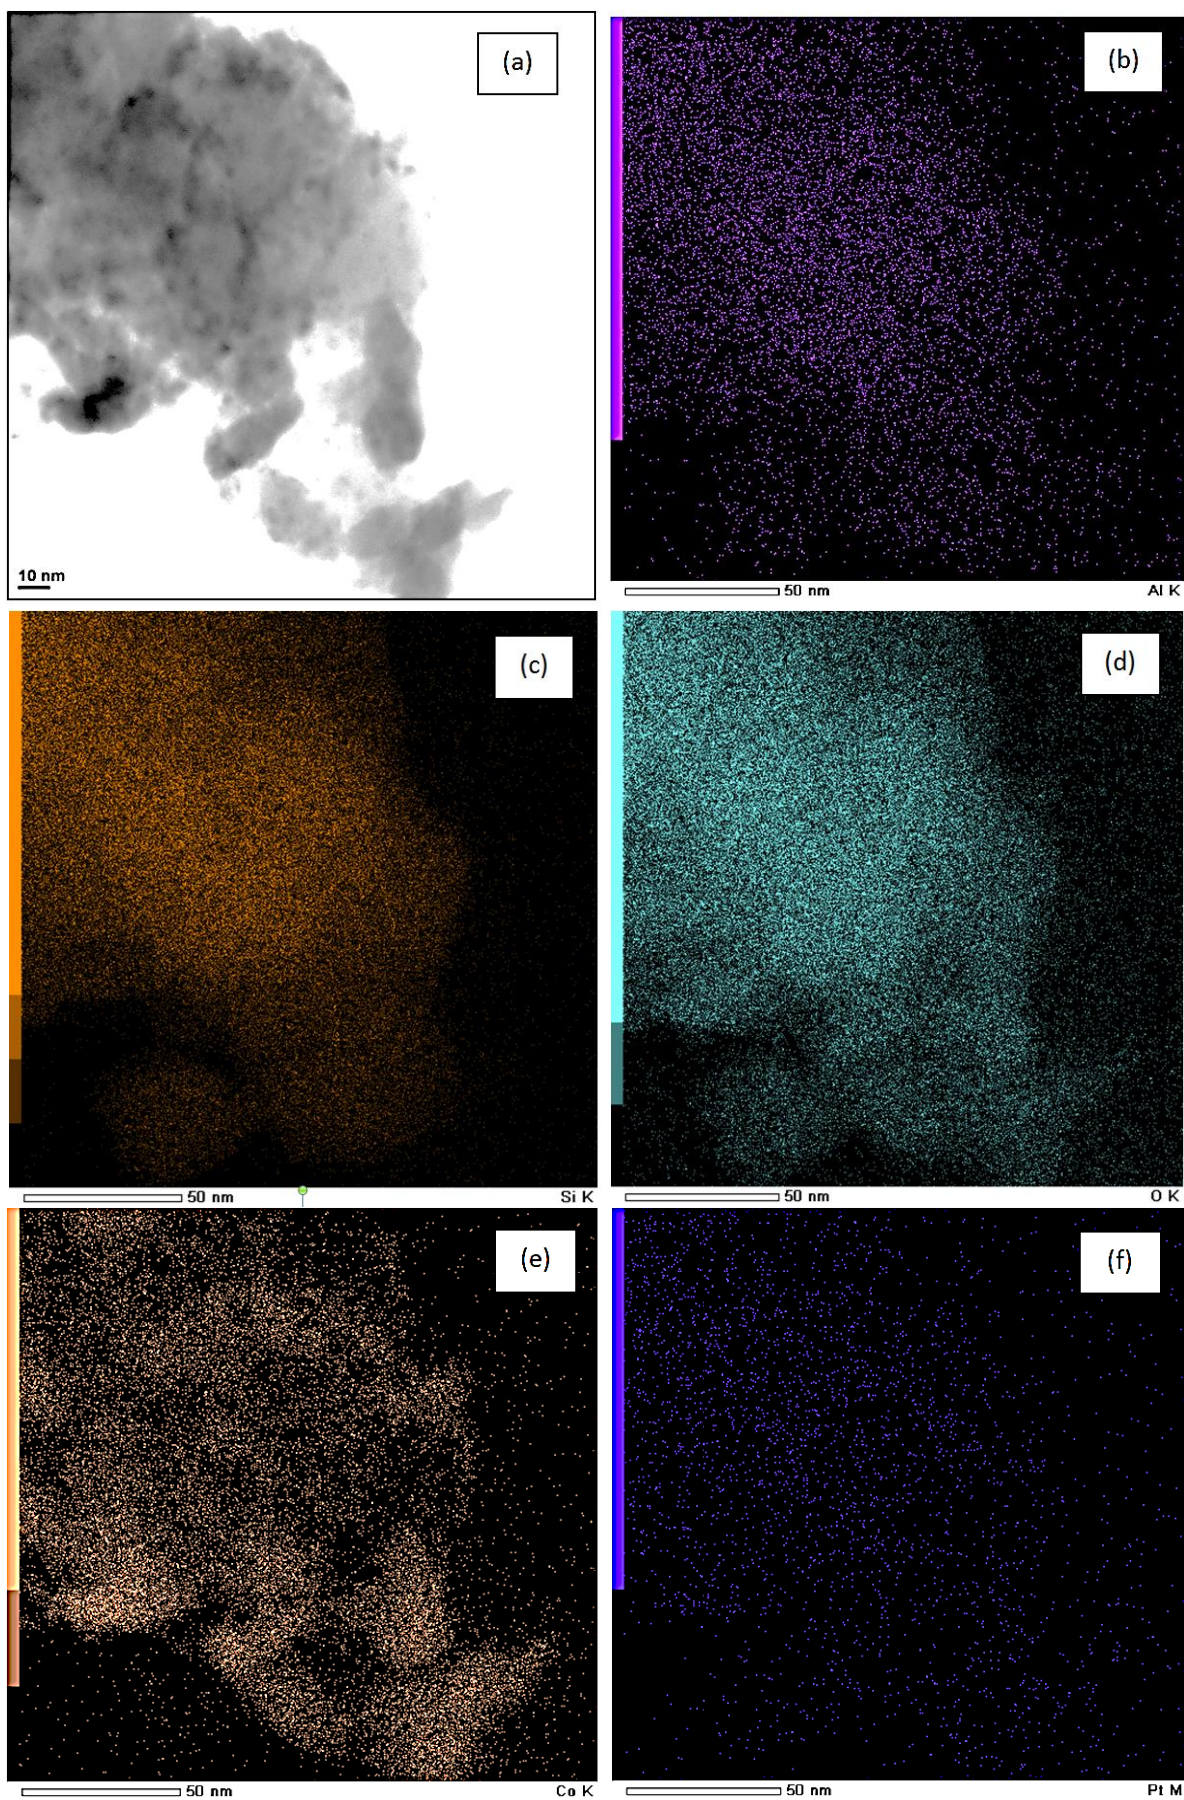

**Figure S6.** (a) TEM image and EDX element distribution maps of (b) Al, (c) Si, (d) O, (e) Co and (f) Pt of 4.5Co/0.01Pt/Z-28.

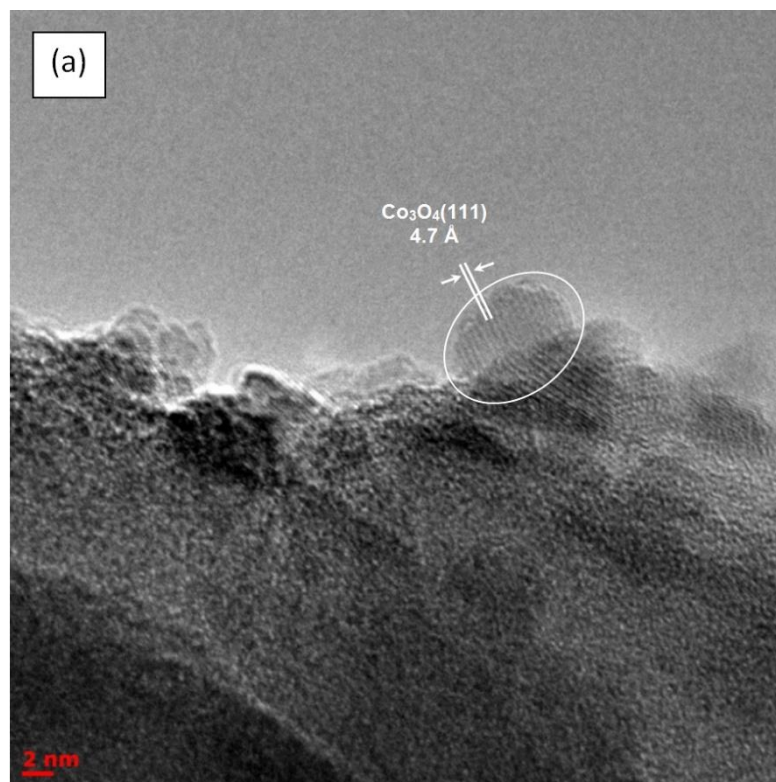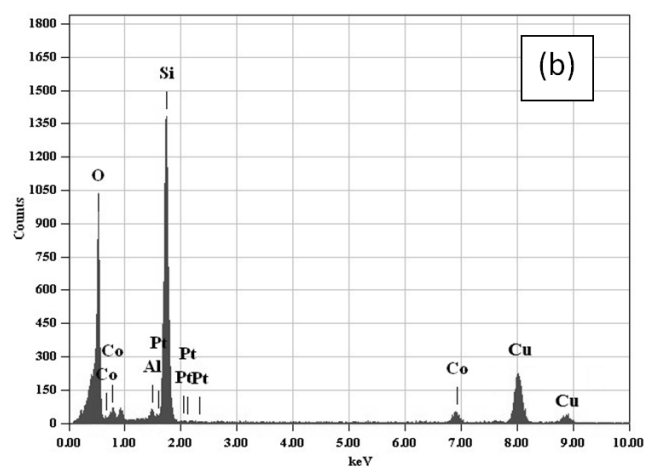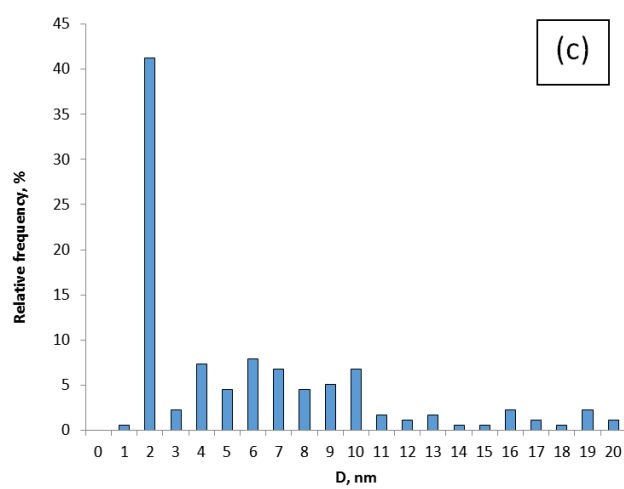

**Figure S7.** (a) TEM image, (b) EDX spectrum, and (c) particle size distribution of 4.5Co/0.01Pt/Z-28.

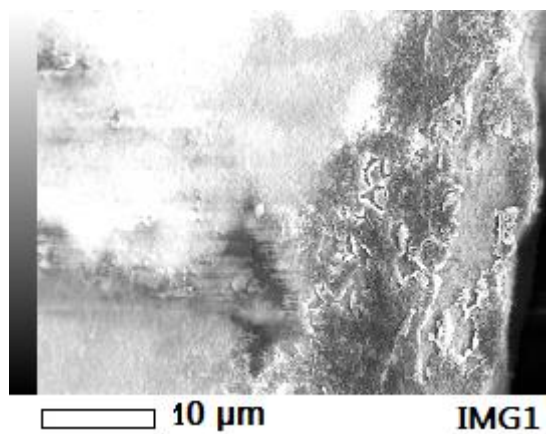

(a)

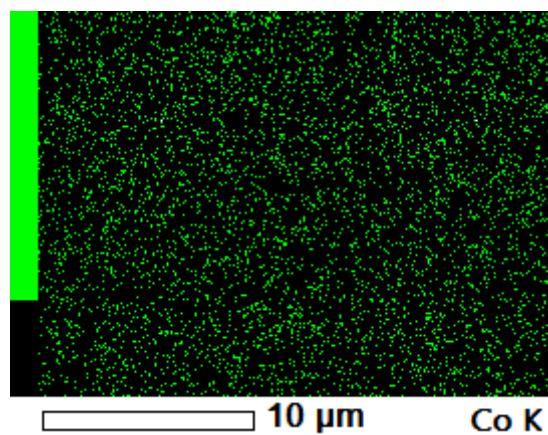

(b)

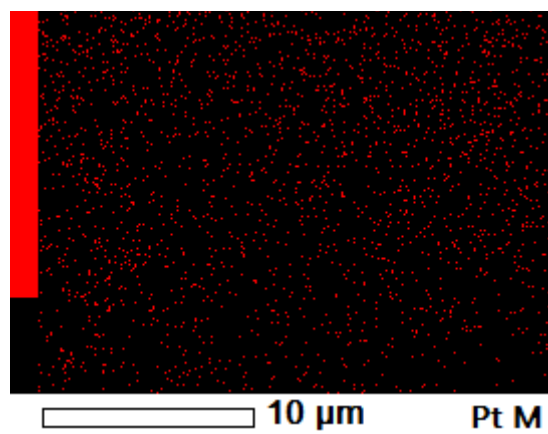

(c)

**Figure S8.** SEM image (a) and EDX element distribution maps of (b) Co and (c) Pt of 0.05Pt/2.5Co/Z-28.
